# Supplementary material for: The Uremic Toxin Indoxyl Sulfate Accelerates Senescence in Kidney Proximal Tubule Cells
Source: MDPI journal article supplement (doi:10.3390/toxins15040242), 2023-03-25

**Table S1. top 5 significant p-values and adj.p-values for KEGG 2021 Human in each cluster.**

| Cluster | Term                                                          | p-value  | adj.p-value | Overlap_genes                                                                                                                                                                                                              |
|---------|---------------------------------------------------------------|----------|-------------|----------------------------------------------------------------------------------------------------------------------------------------------------------------------------------------------------------------------------|
| A       | Cell cycle                                                    | 1.30E-12 | 3.02E-10    | [CDKN2C, PLK1, BUB1B, TTK, CDC6, CDC25C, PKMYT1, CDC25A, CDC20, CCNA2, CCNB2, CCNB1, ORC6, DBF4, PTTG1, ORC1, ESPL1, CDK1, E2F2, SFN, BUB1, MAD2L1]                                                                        |
|         | Oocyte meiosis                                                | 1.56E-06 | 1.81E-04    | [PLK1, CDC25C, FBXO43, PKMYT1, AURKA, CDC20, SGO1, CCNB2, CCNB1, PTTG1, ESPL1, CDK1, FBXO5, BUB1, MAD2L1]                                                                                                                  |
|         | Progesterone-mediated oocyte maturation                       | 1.24E-05 | 9.64E-04    | [CCNA2, CCNB2, CCNB1, PLK1, CDK1, KIF22, CDC25C, PKMYT1, BUB1, CDC25A, AURKA, MAD2L1]                                                                                                                                      |
|         | Gap junction                                                  | 1.93E-05 | 1.12E-03    | [TUBA1C, TUBA1B, TUBB6, TUBB2B, GUCY1B1, TUBA1A, TUBB2A, TUBB, CDK1, TUBB4B, TUBB4A]                                                                                                                                       |
|         | Salmonella infection                                          | 9.63E-04 | 4.49E-02    | [ANXA2, TUBB, TUBB4B, TUBB4A, TNF, PIK3CG, TUBA1C, TUBA1B, TUBB2B, TUBB6, TUBA1A, TUBB2A, IRAK1, PODXL, RHOJ, S100A10]                                                                                                     |
| C       | p53 signaling pathway                                         | 3.80E-05 | 9.71E-03    | [PIDD1, CDKN1A, RRM2B, ZMAT3, SESN1, SESN2, ADGRB1, MDM2, BBC3, DDB2]                                                                                                                                                      |
|         | NF-kappa B signaling pathway                                  | 1.75E-04 | 2.23E-02    | [PIDD1, VCAM1, TNFSF14, BCL2A1, TNFAIP3, CXCL3, PTGS2, CXCL2, CARD11, EDA2R, BIRC3]                                                                                                                                        |
| E       | Protein digestion and absorption                              | 2.00E-06 | 6.45E-04    | [COL15A1, COL16A1, MME, COL25A1, COL11A1, COL12A1, SLC1A1, SLC16A10, ATP1B2, ATP1B1, COL1A2, COL6A2, COL7A1, COL4A6, COL8A2, COL4A5, COL8A1, COL6A5]                                                                       |
|         | Cell adhesion molecules                                       | 3.34E-04 | 3.91E-02    | [CD274, NTNG2, CADM1, NEGR1, SDC2, HLA-B, HLA-A, F11R, HLA-F, L1CAM, HLA-G, CLDN5, PECAM1, ITGB8, NRCAM, CLDN16, TIGIT, JAM2]                                                                                              |
|         | Human papillomavirus infection                                | 4.26E-04 | 3.91E-02    | [NOTCH3, TNXB, WNT2B, NOTCH4, FOXO1, OASL, PARD6B, CCND2, WNT11, ITGB8, WNT2, FZD3, WNT5B, STAT1, MX2, WNT5A, ITGA1, HLA-B, HLA-A, AXIN2, HLA-F, HLA-G, VEGFA, COL1A2, DLG3, COL6A2, COL4A6, COL4A5, ITGA7, MAML3, COL6A5] |
| F       | Cytokine-cytokine receptor interaction                        | 1.31E-08 | 3.00E-06    | [IL33, CXCL6, CSF3, CCL20, GDF15, EBI3, IL24, CXCR4, TNFRSF11B, TNFRSF1B, CX3CL1, IL6, IL36B, IL1B, CCL4, CCL3, ACKR3, IL36RN]                                                                                             |
|         | Complement and coagulation cascades                           | 5.76E-08 | 6.00E-06    | [C3, THBD, C1R, C5AR1, BDKRB2, ITGAX, BDKRB1, C8B, C8A, CLU]                                                                                                                                                               |
|         | Viral protein interaction with cytokine and cytokine receptor | 2.74E-07 | 1.80E-05    | [CXCL6, IL6, CCL20, IL24, CCL4, CCL3, CXCR4, ACKR3, TNFRSF1B, CX3CL1]                                                                                                                                                      |
|         | Inflammatory bowel disease                                    | 1.07E-05 | 5.34E-04    | [IL6, IL1B, RORC, STAT4, RORA, NOD2, TLR2]                                                                                                                                                                                 |
|         | Amoebiasis                                                    | 2.65E-05 | 9.10E-04    | [IL6, GNA15, MUC2, IL1B, CD1D, C8B, C8A, TLR2]                                                                                                                                                                             |

**Table S2. Top 5 significant p-values and adj.p-values for MSigDB Hallmark 2020 in each cluster.**

| Cluster | Term                              | p-value  | adj.p-value | Overlap_genes                                                                                                                                                                                                                                                                                                                                                                                                                                                                 |
|---------|-----------------------------------|----------|-------------|-------------------------------------------------------------------------------------------------------------------------------------------------------------------------------------------------------------------------------------------------------------------------------------------------------------------------------------------------------------------------------------------------------------------------------------------------------------------------------|
| A       | G2-M Checkpoint                   | 5.93E-57 | 2.79E-55    | [TOP2A, H2AX, JPT1, SUV39H1, CCNF, KIF11, MKI67, BRCA2, SMC4, KIF15, LMNB1, CKS1B, CDC20, PTTG1, EXO1, STMN1, PBK, NUSAP1, NEK2, MYBL2, FBXO5, KPNA2, HMGN2, KIF23, KNL1, KIF22, CDC25A, TRAP, CCNA2, DDX39A, DBF4, ESPL1, INCENP, CKS2, BIRC5, KIF2C, KIF20B, TROAP, TTK, HMMR, CENPA, AURKB, AURKA, CCNB2, ORC6, RACGAP1, E2F2, BUB1, PLK4, H2AZ1, GINS2, POLQ, STIL, CDKN2C, UBE2C, PLK1, CDC6, NDC80, TPX2, CENPE, CENPF, UBE2S, PRC1, KIF4A, TACC3, CDK1, MAD2L1, CDKN3] |
|         | E2F Targets                       | 5.53E-53 | 1.30E-51    | [TOP2A, H2AX, JPT1, SUV39H1, DSCC1, HMGB2, BUB1B, MKI67, BRCA2, SMC4, CKS1B, LMNB1, CDC20, PTTG1, STMN1, MYBL2, TK1, KPNA2, DLGAP5, RFC3, TUBB, KIF22, CDC25A, NME1, DDX39A, MELK, ESPL1, CKS2, DEPD1, TIMELESS, BIRC5, KIF2C, DCTPP1, ASF1B, CDCA3, CDCA8, HMMR, AURKB, AURKA, RAD51AP1, CCNB2, ORC6, RACGAP1, LYAR, PLK4, GINS1, H2AZ1, CDKN2C, RRM2, SPAG5, GINS3, PLK1, GINS4, CENPE, KIF18B, DIAPH3, UBE2S, KIF4A, TACC3, CDK1, TRIP13, SPC24, MAD2L1, CDKN3, SPC25]     |
|         | Mitotic Spindle                   | 3.51E-19 | 5.50E-18    | [TOP2A, PIF1, TTK, KIF11, BRCA2, SMC4, KIF15, LMNB1, AURKA, CCNB2, RACGAP1, NUSAP1, NEK2, FBXO5, SYNPO, BUB1, DLGAP5, PLK1, KIF23, KIF22, NDC80, ANLN, TPX2, CENPE, CENPF, ESPL1, INCENP, PRC1, KIF4A, CDK1, BIRC5, KIF2C, KIF20B, EZR, DOCK2]                                                                                                                                                                                                                                |
|         | Spermatogenesis                   | 2.38E-04 | 2.60E-03    | [CCNB2, ARL4A, DBF4, CAMK4, CDK1, NEK2, KIF2C, TTK, BUB1, NCAPH, AURKA, CDKN3]                                                                                                                                                                                                                                                                                                                                                                                                |
|         | Estrogen Response Late            | 2.77E-04 | 2.60E-03    | [PLK4, TOP2A, GINS2, SLC26A2, STIL, CAV1, CDC6, CDC20, FABP5, ACOX2, PRKAR2B, GJB3, ID2, SFN, KIF20A]                                                                                                                                                                                                                                                                                                                                                                         |
| C       | TNF-alpha Signaling via NF-kB     | 5.21E-10 | 1.04E-08    | [BTG2, CDKN1A, CEBPB, CSF2, BCL2A1, CEBPD, TNFAIP3, PTGS2, CXCL3, CXCL2, IFIH1, MAP3K8, ICOSLG, IL15RA, GCH1, GFPT2, SOD2, PNRC1, IL1A, NINJ1, FOSB, PTX3, CD69, PLPP3, BIRC3]                                                                                                                                                                                                                                                                                                |
|         | p53 Pathway                       | 5.21E-10 | 1.04E-08    | [CYFIP2, CDKN1A, BTG2, GLS2, DGKA, HSPA4L, NDRG1, PIDD1, SOCS1, ZMAT3, SESN1, FDXR, CLCA2, CASP1, PHLDA3, ST14, RHBDF2, IRAG2, DDB2, IL1A, KRT17, NINJ1, MDM2, NUPR1, ADA]                                                                                                                                                                                                                                                                                                    |
|         | Interferon Gamma Response         | 1.10E-06 | 1.47E-05    | [IL15RA, CDKN1A, CIITA, VCAM1, GCH1, MX1, TNFAIP3, ISG15, PTGS2, DDX60, SOD2, USP18, IFIH1, SOCS1, IFI27, TNFSF10, CASP1, IRF7, CD69, HERC6]                                                                                                                                                                                                                                                                                                                                  |
|         | Interferon Alpha Response         | 1.71E-03 | 1.71E-02    | [IFIH1, IFI27, MX1, CASP1, IRF7, ISG15, DDX60, USP18, HERC6]                                                                                                                                                                                                                                                                                                                                                                                                                  |
|         | Inflammatory Response             | 4.69E-03 | 3.75E-02    | [NPF2F2, IL15RA, CDKN1A, BTG2, GCH1, LPAR1, RASGRP1, IL1A, RNF144B, TNFSF10, IRF7, CD69, ICOSLG]                                                                                                                                                                                                                                                                                                                                                                              |
| D       | KRAS Signaling Dn                 | 7.42E-04 | 2.97E-02    | [PRKN, EDN1, TGF2, EDN2, KRT4, RSAD2, ARPP21, SLC30A3, IGFBP2, ALOX12B, YBX2, MACROH2A2, P2RX6, P2RY4, NTF3, EFHD1, CDH16, GPR19, RIBC2, TAS2R4]                                                                                                                                                                                                                                                                                                                              |
| E       | Epithelial Mesenchymal Transition | 6.92E-16 | 3.18E-14    | [COL16A1, CXCL8, LRPI, COL11A1, COL12A1, PLOD2, FBLN1, CXCL1, PLOD1, ENO2, FSTL1, SAT1, FBLN5, GJA1, QSOX1, SLIT2, TGM2, CTHRC1, CADM1, PRRX1, IGFBP4, MMP1, LUM, FUCA1, MMP2, WNT5A, APLP1, MMP3, BGN, INHBA, VEGFA, GREM1, COL1A2, FAP, LOX, COL6A2, COL7A1, COL8A2, FMOD, MXRA5, SNTB1, FBN1]                                                                                                                                                                              |
|         | Hypoxia                           | 1.90E-10 | 4.37E-09    | [SCARB1, PFKFB3, SDC2, ADM, VLDLR, ENO2, HK2, CSRP2, FAM162A, STC2, MXI1, PDK3, GPC4, B4GALNT2, PPARGC1A, ANKZF1, PDK1, TGM2, WSB1, DTNA, GAA, BGN, FOS, AMPD3, HS3ST1, VEGFA, EFNA3, PPP1R3C, LOX, P4HA1, DDIT4, RRGD, ALDOC, TMEM45A]                                                                                                                                                                                                                                       |
|         | Interferon Gamma Response         | 4.34E-08 | 6.65E-07    | [LGALS3BP, CD274, CFH, C1S, FPR1, SECTM1, IFI44L, OASL, CCL7, NAMPT, DHX58, EPSTI1, ST8SIA4, PDE4B, CCL2, AUTS2, STAT1, MX2, HLA-B, IFI44, ARID5B, HLA-A, HLA-G, BST2, PLSCR1, OAS2, SSPN, CMPK2, XAF1, CFB]                                                                                                                                                                                                                                                                  |
|         | Estrogen Response Early           | 1.70E-06 | 1.96E-05    | [SCARB1, FOXC1, FCMR, WWC1, HSPB8, SLC1A1, ABAT, ADD3, SLC7A2, GJA1, PDLIM3, ABLIM1, DEPTOR, RPS6KA2, STC2, TGM2, BCL11B, IGFBP4, GFRA1, FOS, GAB2, IL17RB, DHRS3, AR, ELF3, SYT12, RAB17]                                                                                                                                                                                                                                                                                    |
|         | KRAS Signaling Up                 | 5.33E-06 | 4.91E-05    | [ADAMDEC1, ABCB1, CFH, SATB1, HOXD11, TFPI, HSD11B1, CCND2, ADGRA2, PRKG2, ST6GAL1, JUP, PRRX1, FUCA1, IGF2, LAPTM5, INHBA, TRAF1, RBP4, GPRC5B, MAFB, HKDC1, SCG5, PECAM1, TRIB1, CFB]                                                                                                                                                                                                                                                                                       |
| F       | Inflammatory Response             | 1.45E-08 | 5.65E-07    | [CXCL6, CSF3, TNFAIP6, CCL20, AQP9, EBI3, C5AR1, NOD2, TNFRSF1B, CX3CL1, IL6, GNA15, IL1B, BDKRB1, TLR2]                                                                                                                                                                                                                                                                                                                                                                      |
|         | Coagulation                       | 6.94E-07 | 1.35E-05    | [C3, DPP4, THBD, MMP7, GDA, C1R, TFPI2, HTRA1, C8B, CLU, C8A]                                                                                                                                                                                                                                                                                                                                                                                                                 |
|         | TNF-alpha Signaling via NF-kB     | 4.38E-06 | 5.69E-05    | [DUSP4, NR4A2, CXCL6, IL6, TNFAIP6, CCL20, IL1B, KYNU, CCL4, SLC16A6, ACKR3, TLR2]                                                                                                                                                                                                                                                                                                                                                                                            |
|         | Epithelial Mesenchymal Transition | 2.48E-05 | 2.42E-04    | [LRRC15, CXCL6, IL6, IGFBP3, TFPI2, HTRA1, TNFRSF11B, THBS2, SCG2, NID2, DCN]                                                                                                                                                                                                                                                                                                                                                                                                 |
|         | KRAS Signaling Up                 | 1.28E-04 | 1.00E-03    | [IL33, SNAP25, SLPI, FGF9, CCL20, IL1B, IGFBP3, CXCR4, PRDM1, TNFRSF1B]                                                                                                                                                                                                                                                                                                                                                                                                       |

**Table S3. top 10 enrichment pathways from MSigDB Hallmark of DEGs in IS-treatment groups compared to non-treatment groups at different time points.**

| Group           | Term                              | P-value  | Adjusted P-value | Genes                                                                                              |
|-----------------|-----------------------------------|----------|------------------|----------------------------------------------------------------------------------------------------|
| Day1+IS vs Day1 | TNF-alpha Signaling via NF-kB     | 3.69E-22 | 8.50E-21         | CXCL6; CSF2;BCL2A1;GCH1;CCL20;TNFAIP3;CXCL1;CXCL3;PTGS2;CXCL2;IL1A;IL6;NR4A3;CCL2;MSC;ICOSLG;BIRC3 |
|                 | KRAS Signaling Up                 | 1.47E-09 | 1.13E-08         | GPRC5B;CSF2;ABCB1;CCL20;TNFAIP3;SOX9;PTGS2;EREG;BIR                                                |
|                 | Inflammatory Response             | 1.47E-09 | 1.13E-08         | CXCL6; IL1A;IL6;CXCL8;GCH1;CCL20;CCL2;ICOSLG;EREG                                                  |
|                 | Epithelial Mesenchymal Transition | 3.26E-08 | 1.87E-07         | CXCL6; IL6;CXCL8;CADM1;MMP1;LUM;TNFAIP3;CXCL1                                                      |
|                 | Apoptosis                         | 2.94E-06 | 1.35E-05         | IL1A; IL6;GCH1;LUM;EREG;BIRC3                                                                      |
|                 | IL-6/JAK/STAT3 Signaling          | 6.60E-05 | 2.53E-04         | IL6; CSF2;CXCL1;CXCL3                                                                              |
|                 | Interferon Gamma Response         | 1.40E-04 | 4.59E-04         | IL6;GCH1;TNFAIP3;CCL2;PTGS2                                                                        |
|                 | UV Response Up                    | 6.51E-04 | 1.87E-03         | IL6;ABCB1;GCH1;CXCL2                                                                               |
|                 | Allograft Rejection               | 1.56E-03 | 3.99E-03         | IL6;CCL2;ICOSLG;EREG                                                                               |
| Day3+IS vs Day3 | Pperoxisome                       | 2.24E-03 | 5.16E-03         | ABCB1;CADM1;SERPINA6                                                                               |
|                 | TNF-alpha Signaling via NF-kB     | 5.49E-04 | 9.33E-03         | IFIH1;TIPARP;SLC16A6;FOSB                                                                          |
|                 | Hypoxia                           | 5.53E-02 | 1.34E-01         | TIPARP;STC2                                                                                        |
|                 | Glycolysis                        | 5.53E-02 | 1.34E-01         | STC2;CACNA1H                                                                                       |
|                 | Estrogen Response Early           | 5.53E-02 | 1.34E-01         | TIPARP;STC2                                                                                        |
|                 | Myogenesis                        | 5.53E-02 | 1.34E-01         | STC2;CACNA1H                                                                                       |
|                 | KRAS Signaling Up                 | 5.53E-02 | 1.34E-01         | SLPI;SPP1                                                                                          |
|                 | Epithelial Mesenchymal Transition | 5.53E-02 | 1.34E-01         | SPP1;MXRA5                                                                                         |
|                 | Angiogenesis                      | 6.62E-02 | 1.41E-01         | SPP1                                                                                               |
| Day9+IS vs Day9 | Interferon Alpha Response         | 1.69E-01 | 3.00E-01         | IFIH1                                                                                              |
|                 | PI3K/AKT/mTOR Signaling           | 1.81E-01 | 3.00E-01         | MAP2K6                                                                                             |
|                 | Epithelial Mesenchymal Transition | 9.93E-06 | 2.98E-04         | RGS4;CDH6;CXCL6;MMP1;IGFBP3;IGFBP2;MMP3;SLIT2;MXR                                                  |
|                 | Coagulation                       | 3.79E-04 | 5.69E-03         | THBD;SERPINB2;CFH;MMP1;C1R;MMP3                                                                    |
|                 | Hypoxia                           | 2.58E-03 | 2.58E-02         | PPP1R3C;IGFBP3;STC2;SLC2A5;PPFIA4;CP                                                               |
|                 | TNF-alpha Signaling via NF-kB     | 1.23E-02 | 5.27E-02         | CXCL6;SERPINB2;CCL4;FOSB;IFIT2                                                                     |
|                 | Estrogen Response Early           | 1.23E-02 | 5.27E-02         | CYP26B1;STC2;AQP3;DHRS2;PTGES                                                                      |
|                 | Myogenesis                        | 1.23E-02 | 5.27E-02         | NQO1;PPP1R3C;IGFBP3;STC2;PPFIA4                                                                    |
|                 | Complement                        | 1.23E-02 | 5.27E-02         | ITGAM;SERPINB2;CFH;C1R;CP                                                                          |
|                 | Angiogenesis                      | 2.52E-02 | 9.45E-02         | CXCL6;THBD                                                                                         |
|                 | Interferon Alpha Response         | 2.91E-02 | 9.69E-02         | IFITM1;LAMP3;IFIT2                                                                                 |
|                 | Estrogen ResponseLate             | 4.89E-02 | 1.33E-01         | CYP26B1;DHRS2;ASS1;PTGES                                                                           |

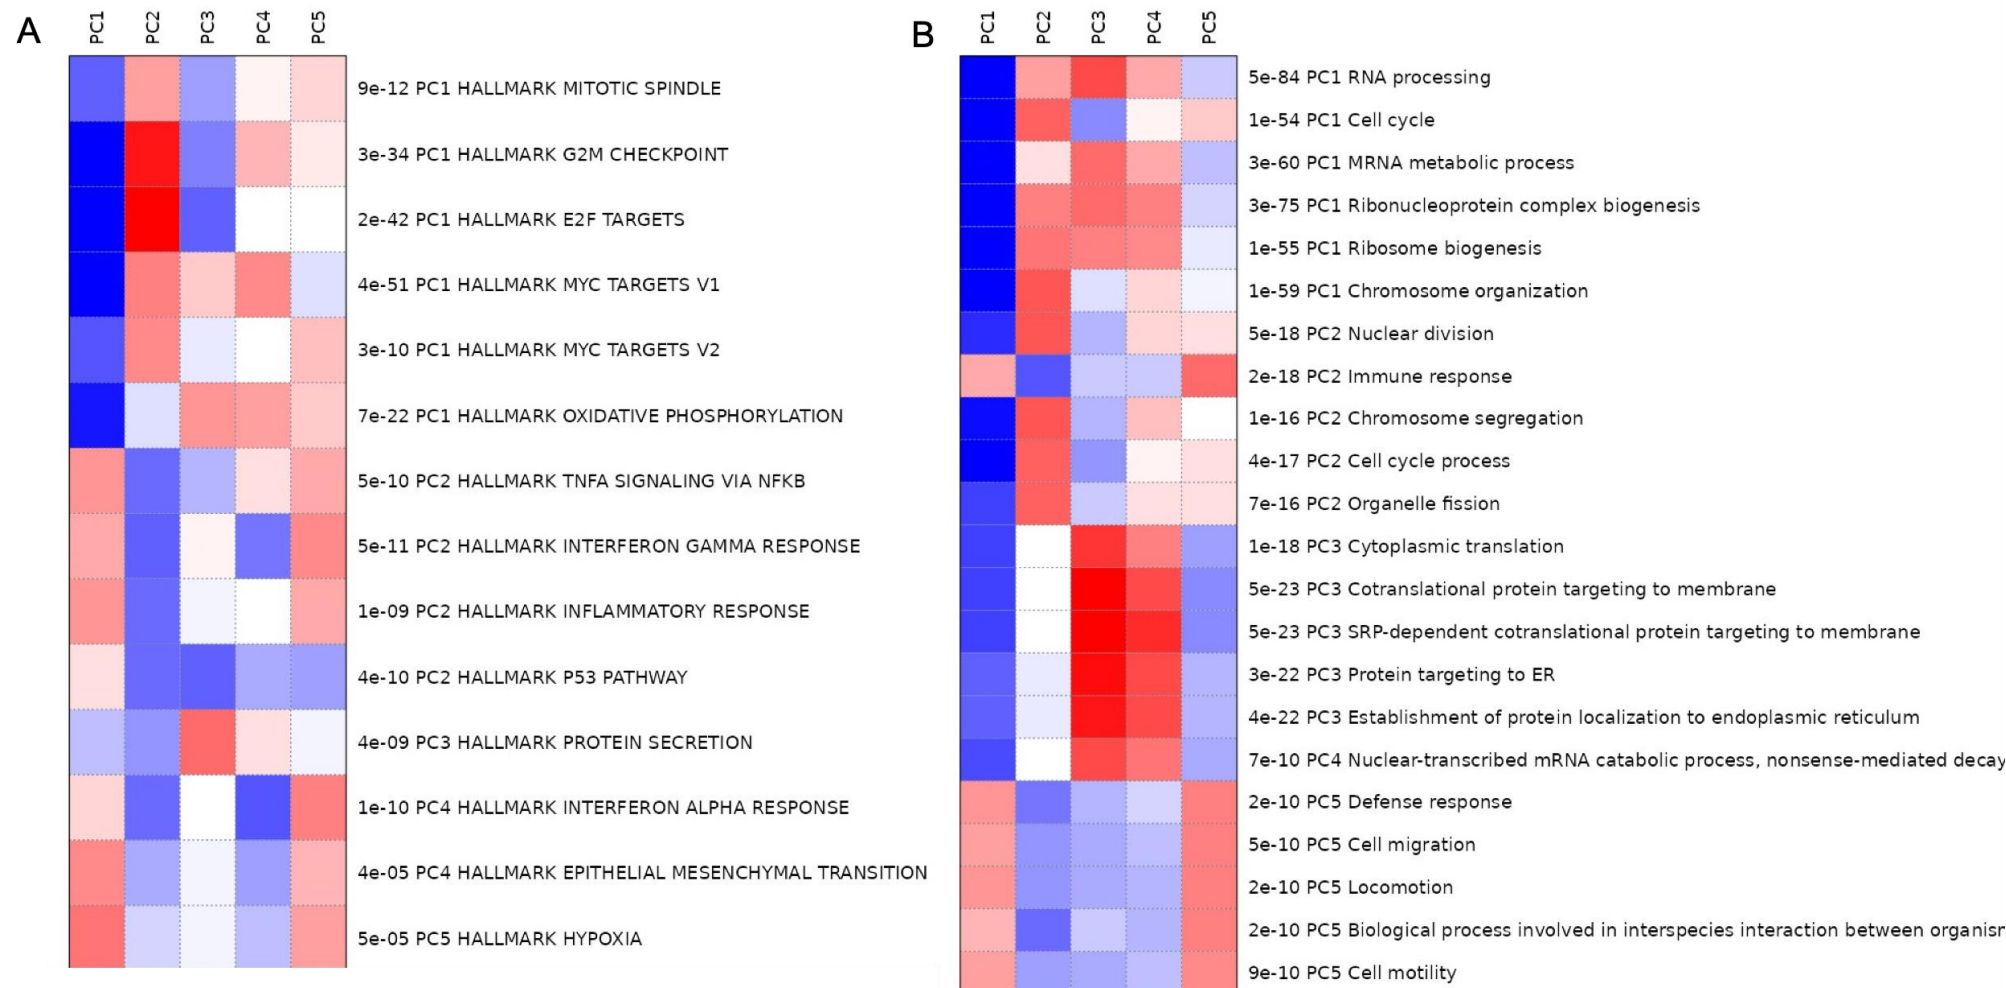

**Figure S1. Pathway Analysis of PCA rotation.** Pathway analysis is based on (A) MSigDB Hallmark and (B) Gene Ontology (GO) biological process. The adjusted P-values are used to rank the pathways for each of the first 5 principal components. The pathways are labeled with FDR first, followed by the principal components (PC1, PC2 and so on). Only 6 pathways for each principal components are shown, but duplicated ones are skipped.

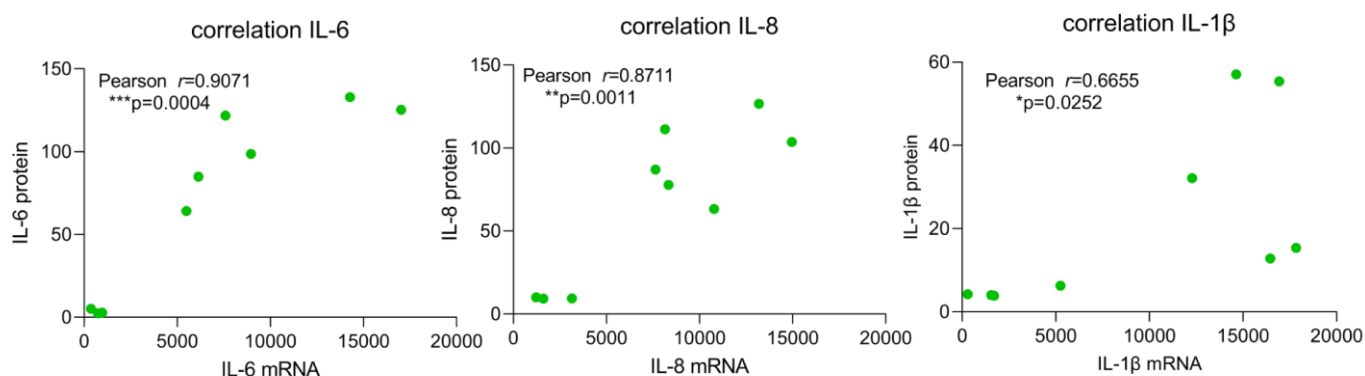

**Figure S2. Correlation analysis of IL-6, IL-8, and IL-1 $\beta$  protein level in Figure 3 and mRNA abundance in Figure 5.** Protein levels and gene counts are on day 0, day 3, and day 9 with the treatment of IS (200  $\mu$ M).  $P < 0.05$  is considered to be statistically significant.

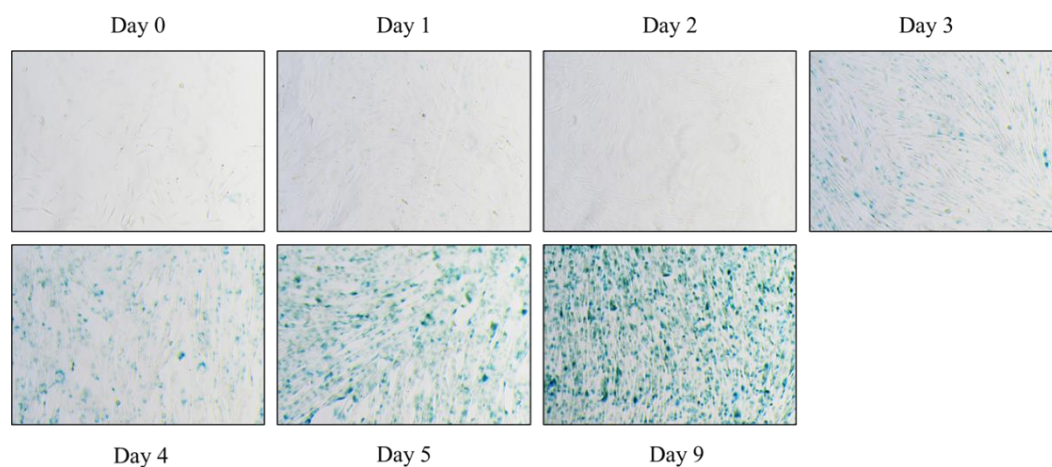

**Figure S3. SA- $\beta$ -gal activity in ciPTEC-OAT1 during culture at non-permissive temperature.** Representative images of SA- $\beta$ -gal staining in ciPTEC-OAT1 cultured for 0 through 9 days at 37  $^{\circ}$ C. Three independent experiments were performed.

Figure S4. Exposure to IS leads to sustained common senescence markers expression in ciPTEC-OAT1 at non-permissive temperature of 37°C.

| Figure2 A and C |    |          |          |          |          |          |           |          |          |          |          |          |          |          |  |
|-----------------|----|----------|----------|----------|----------|----------|-----------|----------|----------|----------|----------|----------|----------|----------|--|
| laminb1 66KD    | D0 |          | D3       |          |          |          | D6        |          |          |          | D9       |          |          |          |  |
|                 | 0  | 0        | 0        | 50       | 100      | 200      | 0         | 50       | 100      | 200      | 0        | 50       | 100      | 200      |  |
| 1               |    | 1,273743 | 1,540788 | 1,240701 | 1,487106 | 1,182962 | 1,362591  | 1,167913 | 0,898066 | 0,873887 | 0,924811 | 0,773353 | 0,825469 | 0,58539  |  |
| 2               |    | 1,332153 | 1,543898 | 1,347214 | 1,047683 | 1,10861  | 1,124197  | 1,343087 | 0,900824 | 0,754869 | 0,598426 | 0,895715 | 1,024614 | 0,501037 |  |
| 3               |    | 1,294441 | 2,366507 | 1,631614 | 1,518184 | 1,685858 | 0,959858  | 0,778055 | 0,569896 | 0,697054 | 0,77864  | 0,571629 | 0,562489 | 0,489033 |  |
| P21 (21KD)      |    |          |          |          |          |          |           |          |          |          |          |          |          |          |  |
| 1               |    |          | 0,717195 | 0,993097 | 1,374536 | 1,415576 | 2,458695* | 2,548834 | 1,813102 | 1,596976 | 0,66553  | 1,537727 | 1,772006 | 1,160755 |  |
| 2               |    |          | 0,559451 | 0,885949 | 1,004418 | 0,761059 | 1,137537  | 2,281764 | 2,560881 | 1,697365 | 0,644766 | 0,950888 | 1,12494  | 0,606325 |  |
| 3               |    |          | 1,221396 | 1,332109 | 1,090661 | 0,819061 | 0,632169  | 0,855653 | 0,648725 | 0,806503 | 0,498862 | 0,89509  | 1,178016 | 0,709862 |  |
| 4               |    |          | 0,86138  | 0,863684 | 1,069616 | 1,110895 | 0,719731  | 1,169171 | 1,241839 | 1,164127 | 1,204798 | 1,202833 | 1,708423 | 1,701798 |  |

Lamin B1 66 kDa

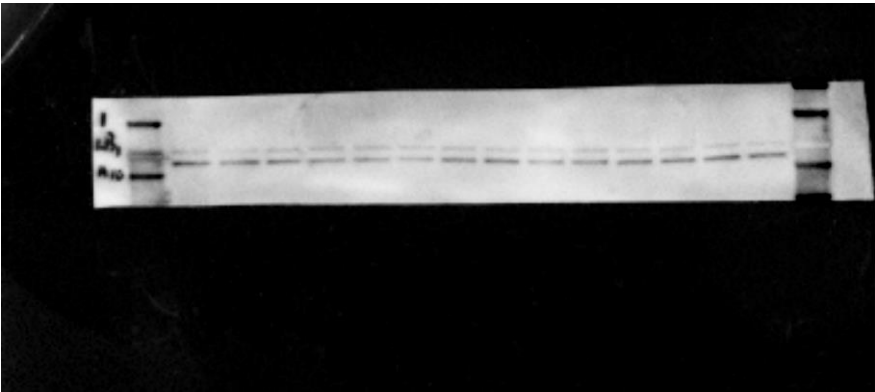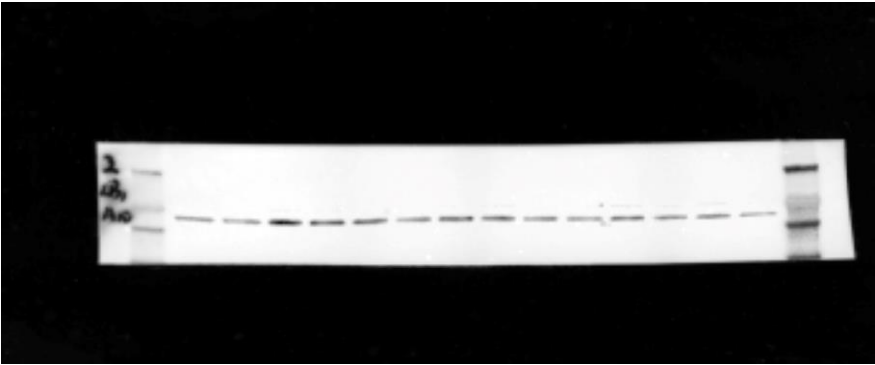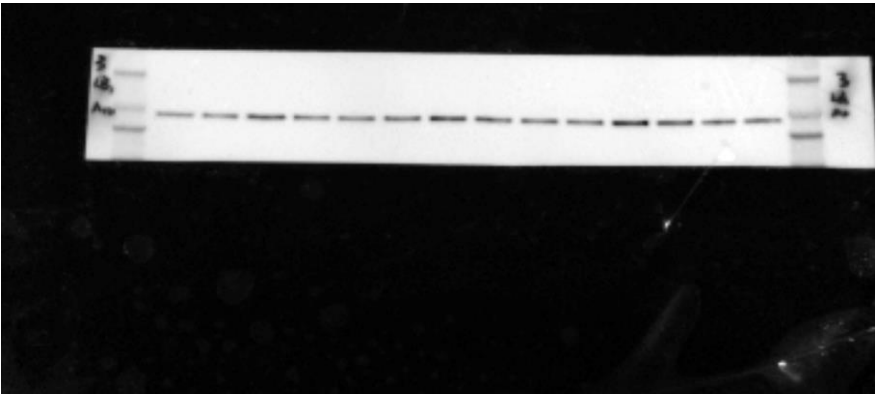

P21 (21 kDa)

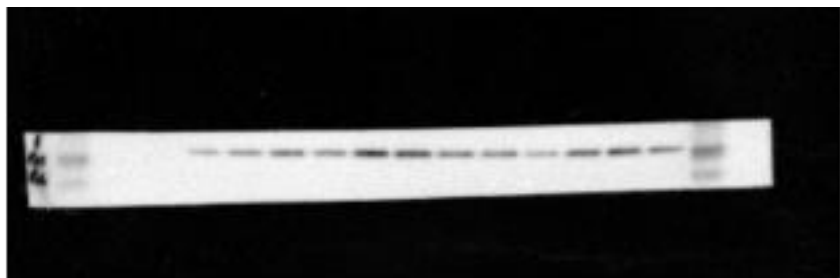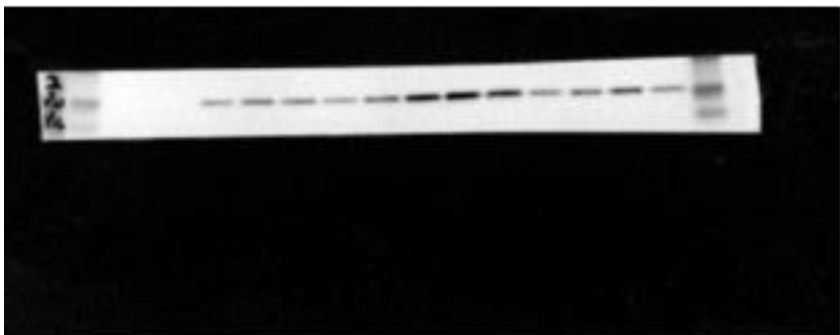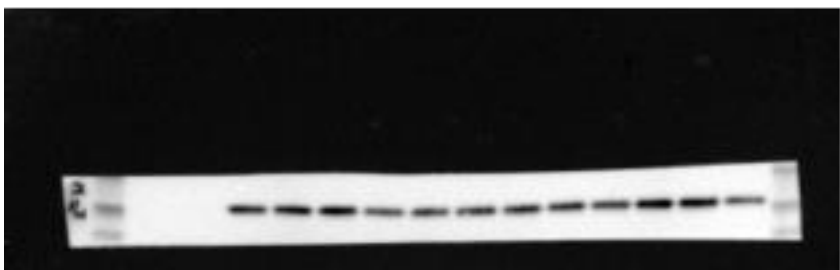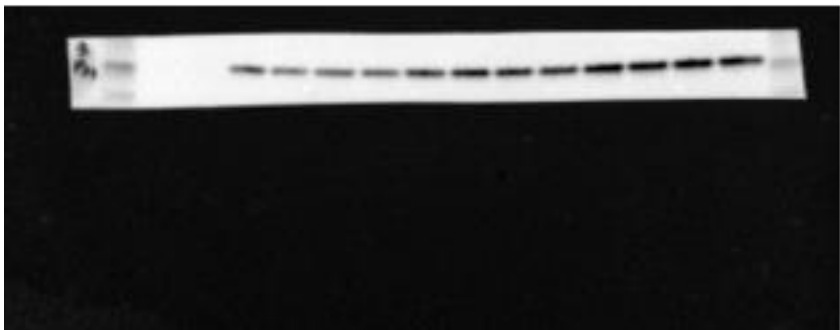

**b-actin (42 kDa)**

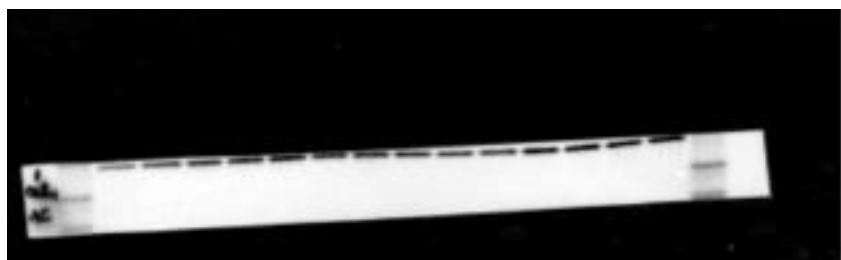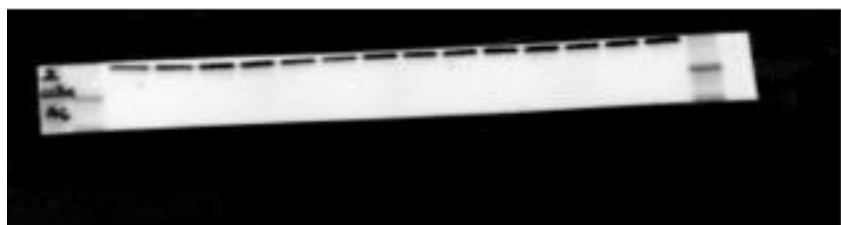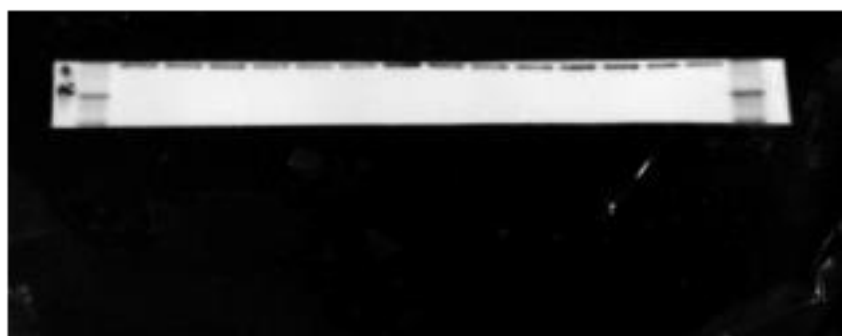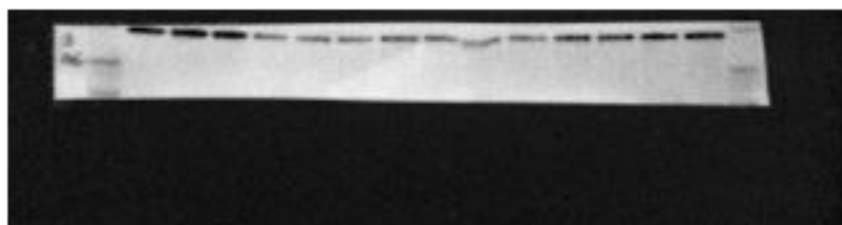

Supplement: s1 [file s1]
